# Supplementary material for: Long noncoding RNA H19 regulates degeneration and regeneration of injured peripheral nerves
Source: PubMed Central journal article supplement — Neural Regen Res. 2022 Dec 21;18(8):1847–51. doi: 10.4103/1673-5374.363182 (PMC10154483; doi:10.4103/1673-5374.363182), 2022-12-21
Supplement: NRR-18-1847_Suppl2.pdf [file NRR-18-1847_Suppl2.pdf]

## OPEN PEER REVIEW REPORT 2

**Name of journal:** Neural Regeneration Research

**Manuscript NO:** NRR-D-22-00491

**Title:** LncRNA H19 Regulates Nerve Degeneration and Regeneration by Activating SEMA 6D in Injured Rat Peripheral Nerves

**Reviewer's Name:** Franck Sturtz

**Reviewer's country:** France

### COMMENTS TO AUTHORS

This paper is on a very interesting topic: the role of lncRNA, in this case H19, in the nerve regeneration process. However, I would like to have some major changes made before having it published.

First, the abstract should be much more informative than it is written now.

Second, I would appreciate if the authors could improve the presentation of their work.

For instance :

- the introduction talks about H19 and thereafter AAV are being presented, Why ? For which purpose ?

The last sentences of this introduction should provide the general scheme of the entire paper (AAV, SEMA,...). This would make the entire study more understandable.

- Table 1 is totally unclear to me since I have not performed the experiment nor constructed the vectors. Please clarify.

- the role of SEMA 6D and its mode of action (interaction with H19) should be noticeably clarified.

-...

Finally, I found the discussion quite deceiving. The role of H19 should be also discussed in the light of what has been found in oncology.

In summary, very interesting paper but please, make it more understandable
